# Supplementary material for: Functional characterization of ABCA4 genetic variants related to Stargardt disease
Source: Springer Nature journal article supplement (doi:10.1038/s41598-022-26912-6), 2022-12-24
Supplement: MOESM1 [file 41598_2022_26912_MOESM1_ESM.pdf]

## Supplementary Information For

### Functional characterization of *ABCA4* genetic variants related to Stargardt disease

Bo Min Kim<sup>1,2</sup>, Hyo Sook Song<sup>1,2</sup>, Jin-Young, Kim<sup>1</sup>, Eun Young Kwon<sup>1</sup>, Seung Yeon Ha<sup>1</sup>, Minsuk Kim<sup>1</sup>, Ji Ha Choi<sup>1,\*</sup>

<sup>1</sup>Department of Pharmacology, Inflammation-Cancer Microenvironment Research Center, College of Medicine, Ewha Womans University, Seoul, Korea

<sup>2</sup>B.M.Kim and H.S.Song contributed equally to this study.

\*Corresponding author: jihachoi@ewha.ac.kr

### Correspondence to

**Ji Ha Choi, M.D., Ph.D.**

Department of Pharmacology, Inflammation-Cancer Microenvironment Research Center

College of Medicine, Ewha Womans University, Seoul, Korea

25 Magokdong-ro 2-gil, Gangseo-gu, Seoul 07804, Korea

Phone: +82-2-6986-6173; Fax: +82-2-6986-7017; E-mail: jihachoi@ewha.ac.kr

**Supplementary Figure 1. Effect of *ABCA4* variants on *ABCA4* surface expression.** HEK-293T cells were transfected with *ABCA4* wild-type or variant plasmids, and a surface biotinylation assay was conducted. Among figures, the figures named 'Repeat 1' were used in the main manuscript.

## Repeat 1

**Blot: ABCA4**

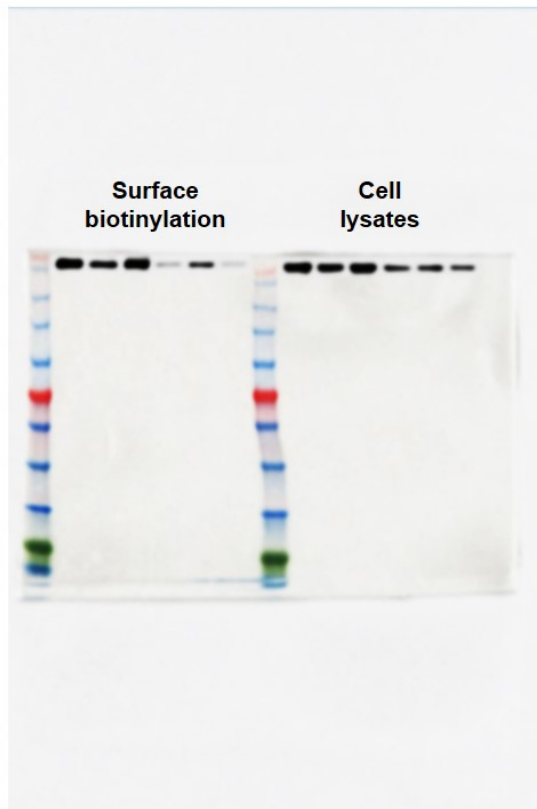

**Blot: Na<sup>+</sup>/K<sup>+</sup> ATPase**

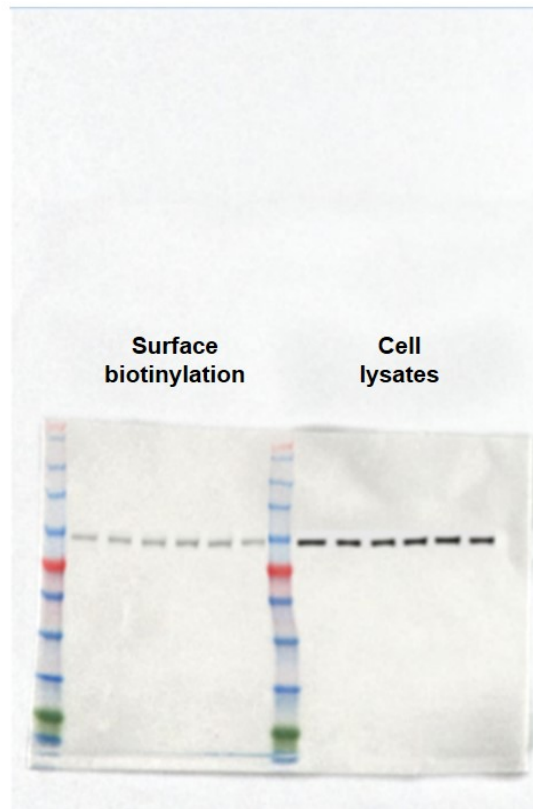

**Blot: Aldolase A**

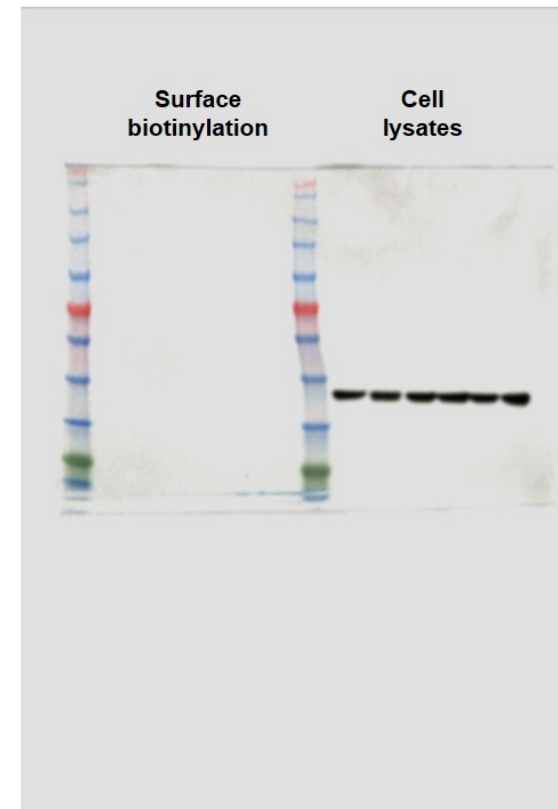

## Repeat 2

Blot: ABCA4

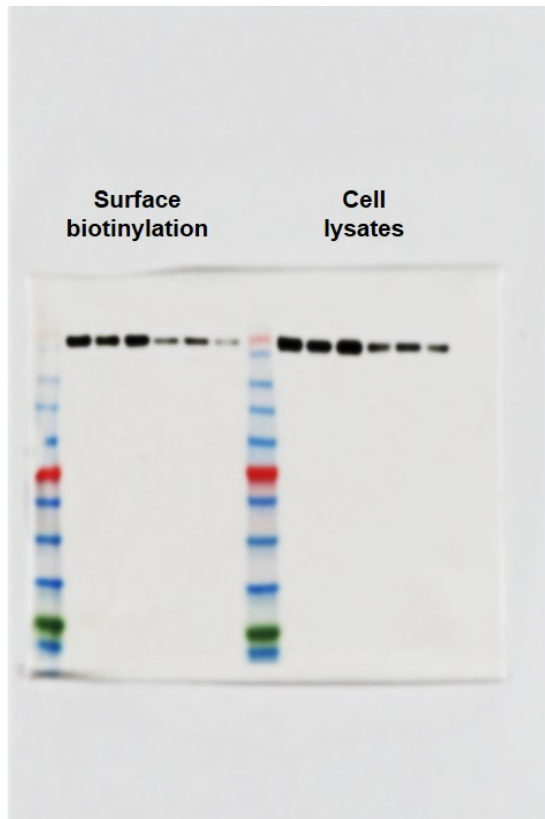

Blot: Na<sup>+</sup>/K<sup>+</sup> ATPase

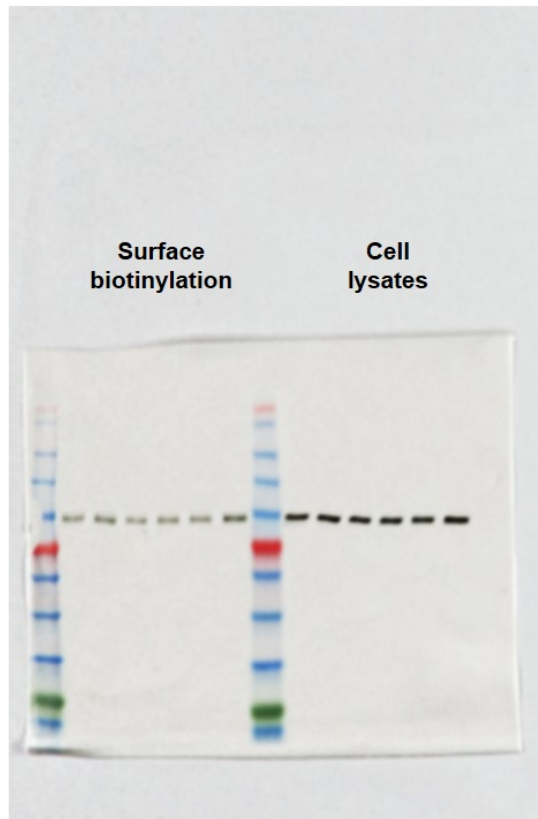

Blot: Aldolase A

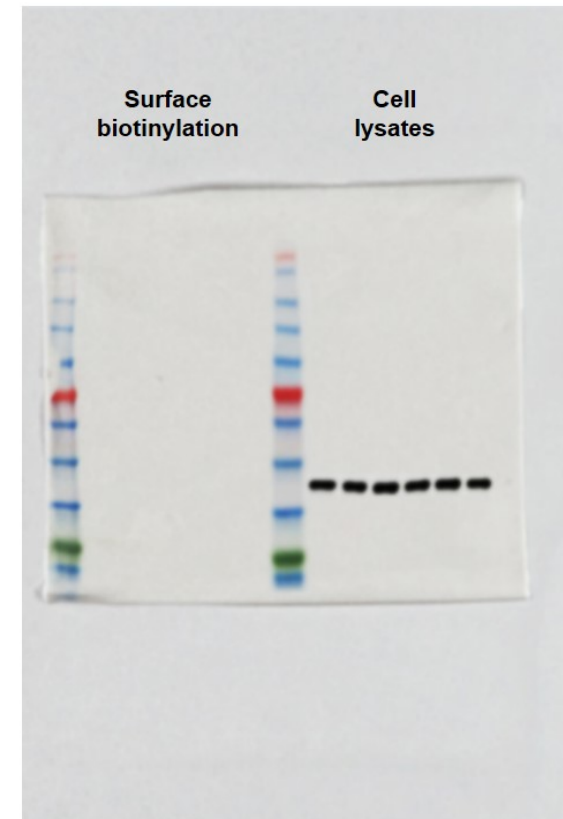

## Repeat 3

Blot: ABCA4

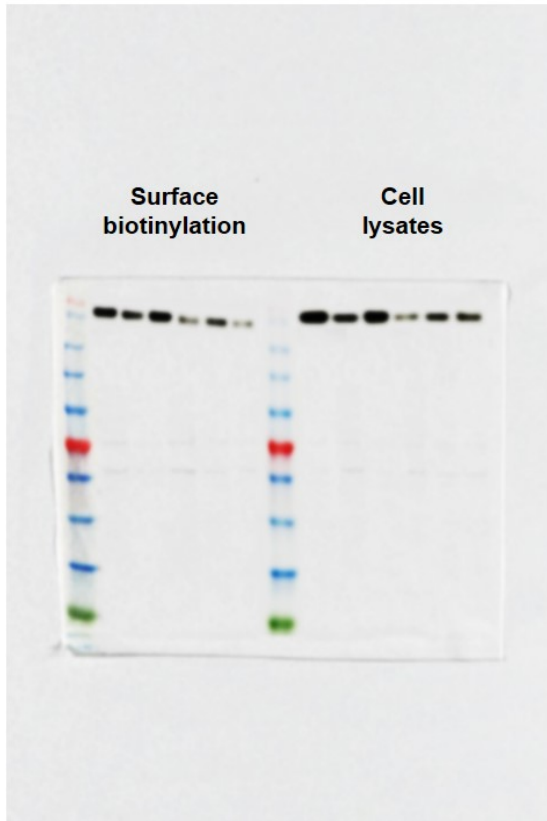

Blot: Na<sup>+</sup>/K<sup>+</sup> ATPase

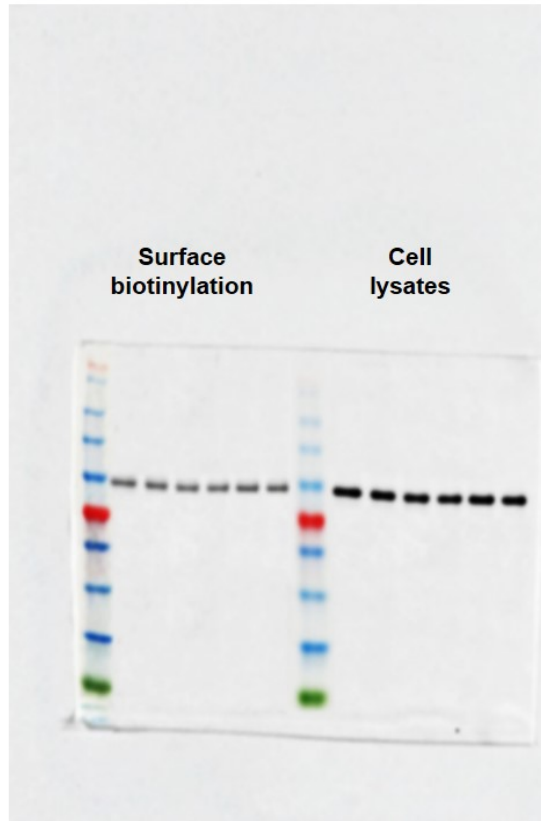

Blot: Aldolase A

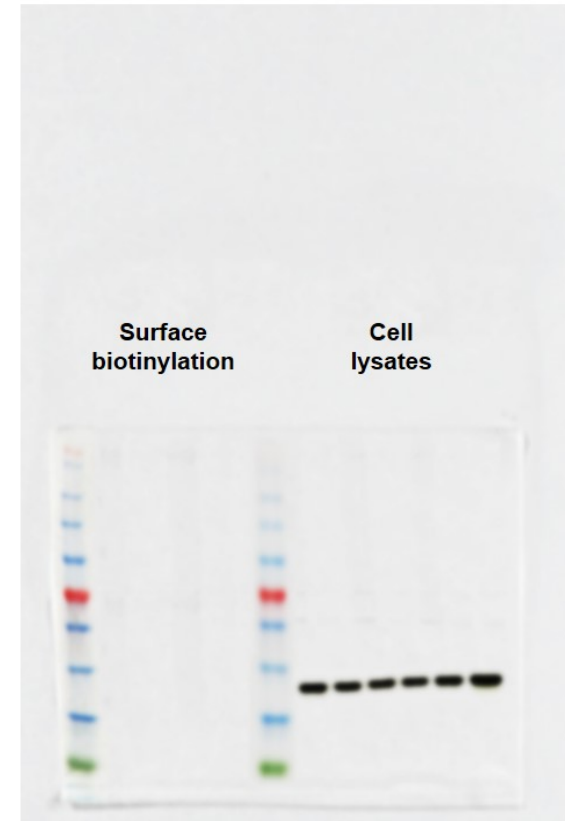

**Supplementary Figure 2. Effect of MG132 or bafilomycin A<sub>1</sub> on ABCA4 expression.** *ABCA4* expression was examined after transfection with *ABCA4* wild-type or variant plasmids. Immunoblotting was performed after treatment with MG132 **(a)** or bafilomycin A<sub>1</sub> **(b)**. Among figures, the figures named 'Repeat 1' were used in the main manuscript.

**(a)**

**Repeat 1**

**Blot: ABCA4**

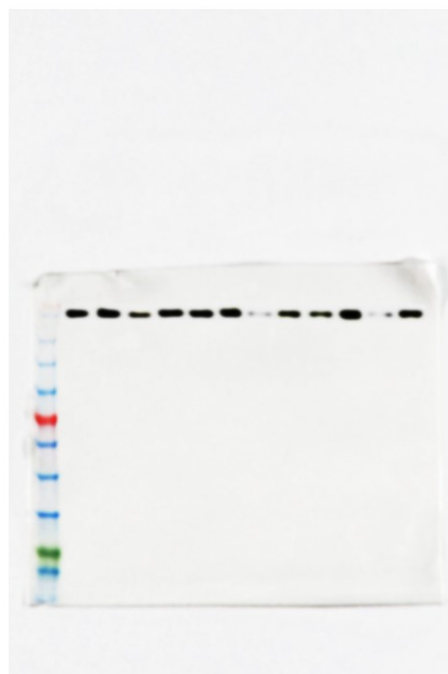

**Blot: Actin**

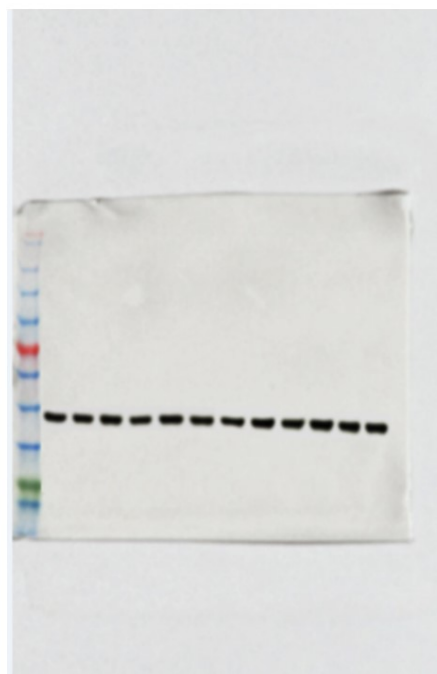

## Repeat 2

Blot: ABCA4

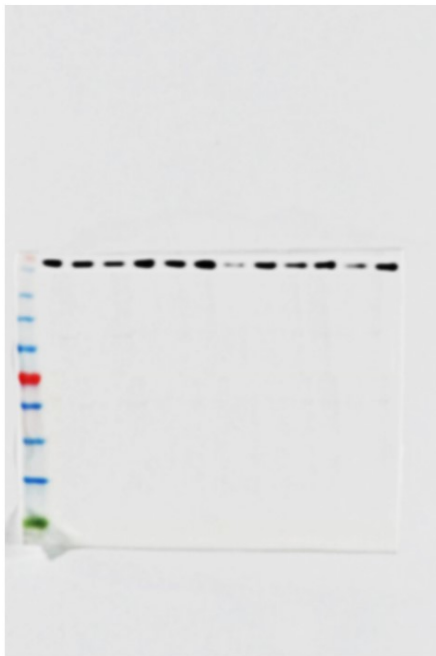

Blot: Actin

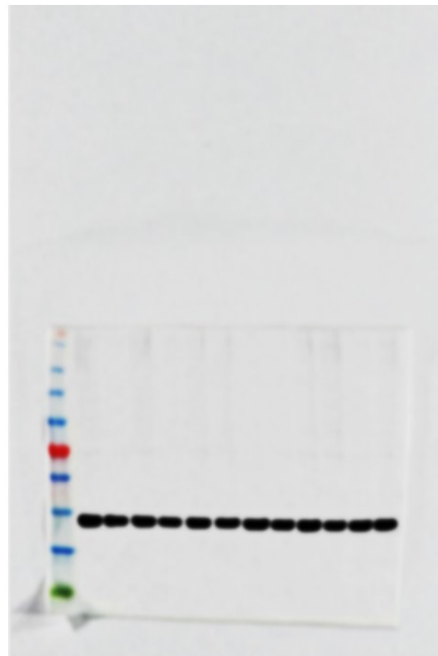

## Repeat 3

Blot: ABCA4

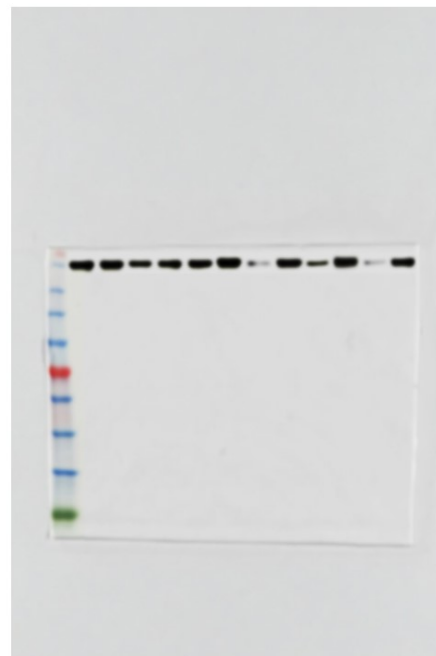

Blot: Actin

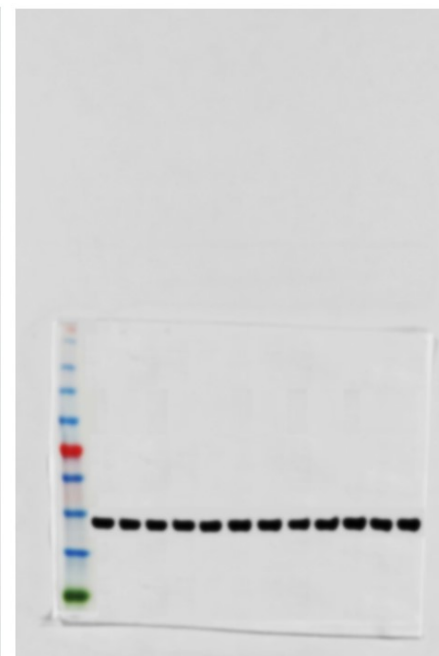

(b)

## Repeat 1

Blot: ABCA4

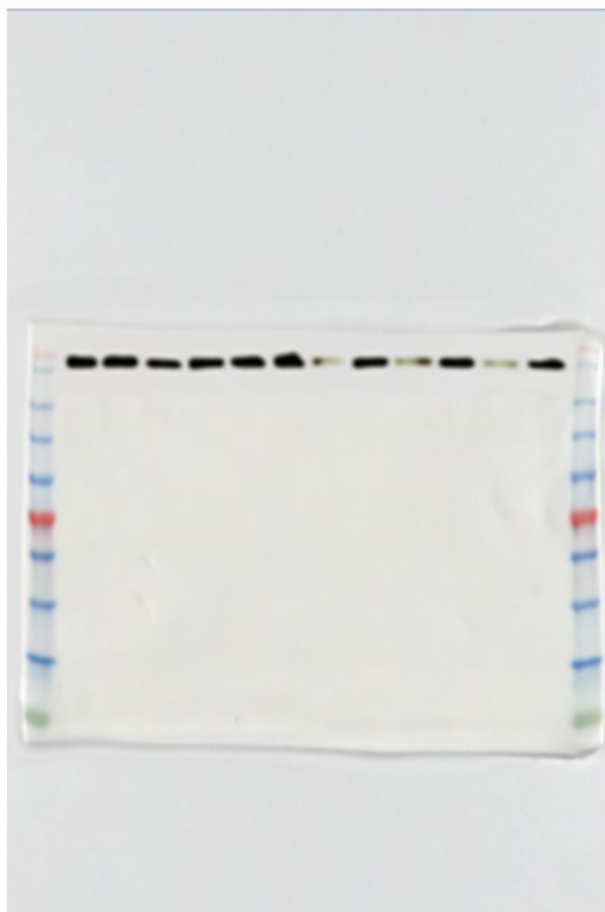

Blot: Actin

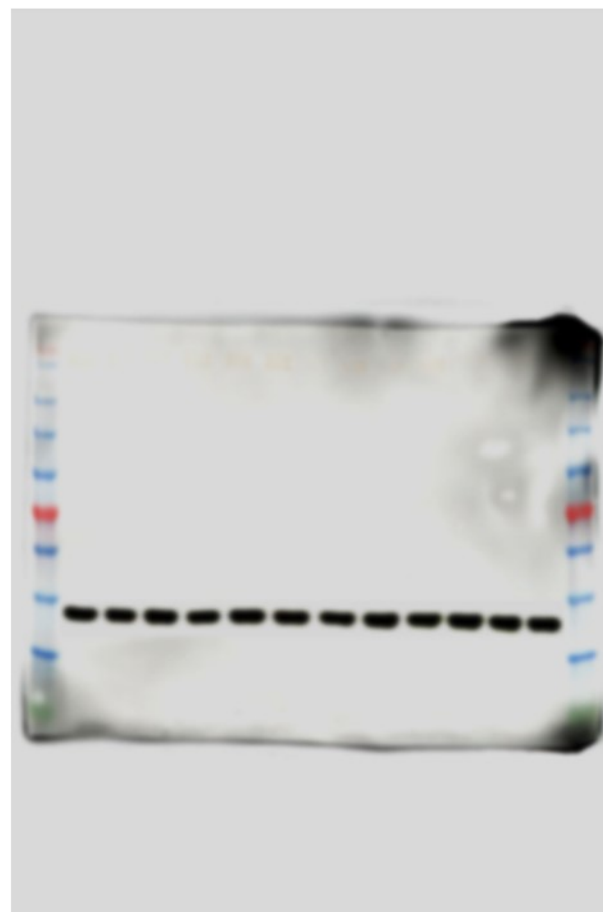

## Repeat 2

Blot: ABCA4

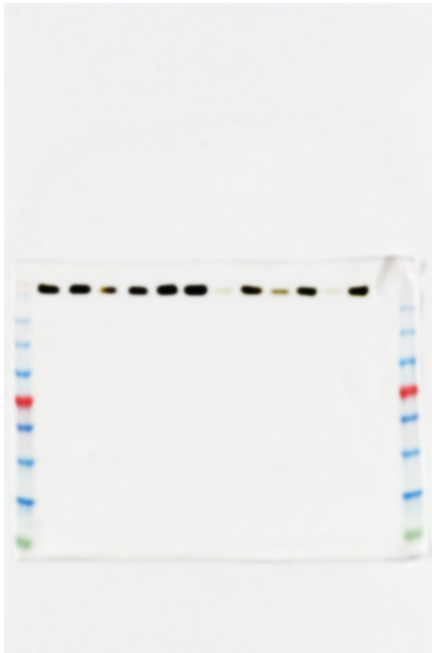

Blot: Actin

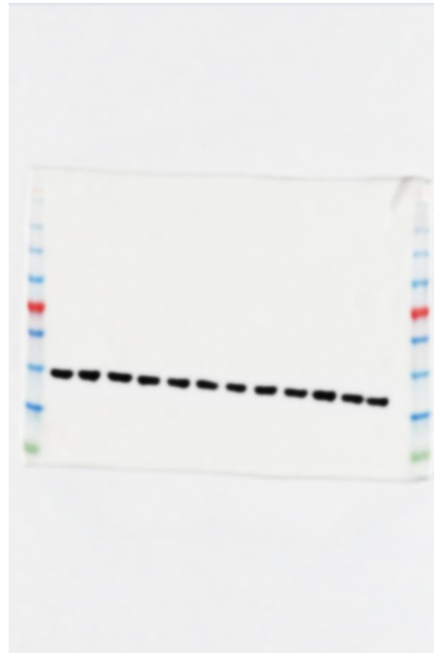

## Repeat 3

Blot: ABCA4

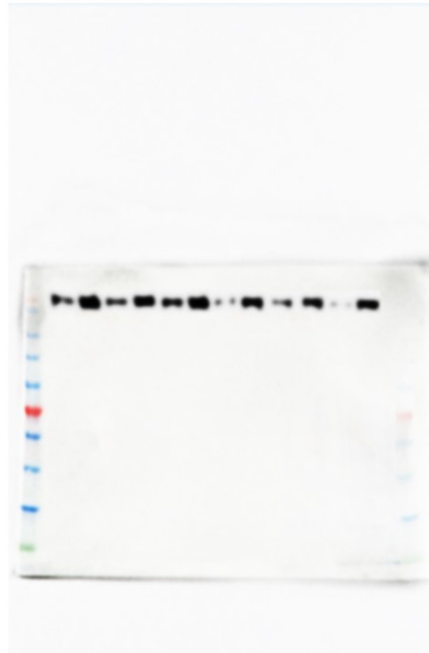

Blot: Actin

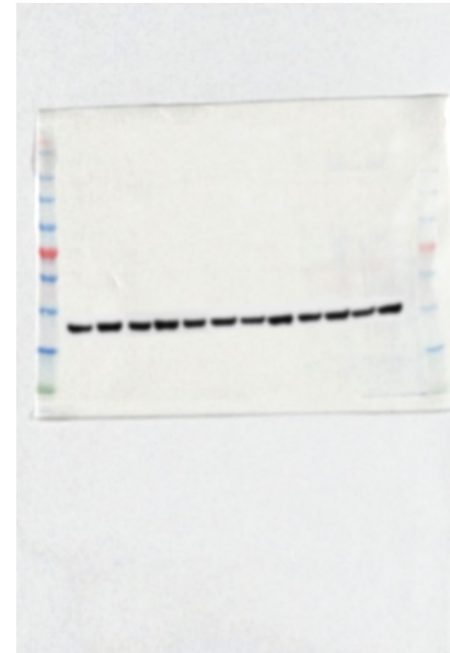



**Supplementary Figure 3. Gel shift assays.**  $^{32}$ P-labeled oligonucleotides [lanes 1-3, GATA-2 consensus; lanes 4-6, wild-type c.-1086A; lanes 7-9, c.-1086C variant, **(a)**, lanes 1-3, HLF consensus; lanes 4-6, wild-type c.-900A; lanes 7-9, c.-900T variant, **(b)**, lanes 1-3, GATA-2 consensus; lanes 4-6, wild-type c.-761C; lanes 7-9, c.-761A variant, **(c)**] were incubated with nuclear protein extracts. Competition and supershift assays were performed. Each arrow indicates the band of the DNA-protein complex. Among figures, the figures named 'Repeat 1' were used in the main manuscript.

(a)

Repeat 1

Repeat 2

Repeat 3

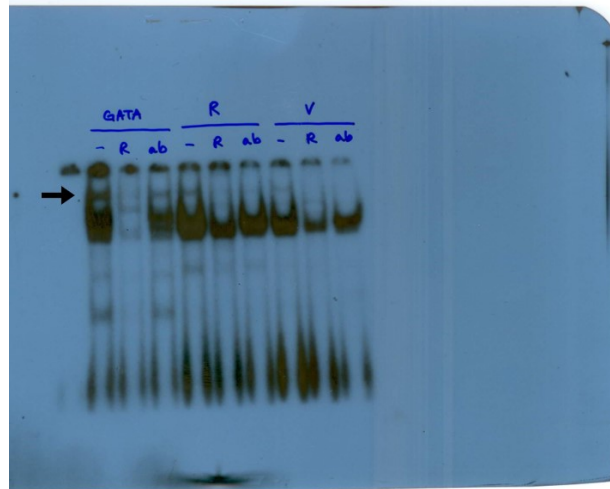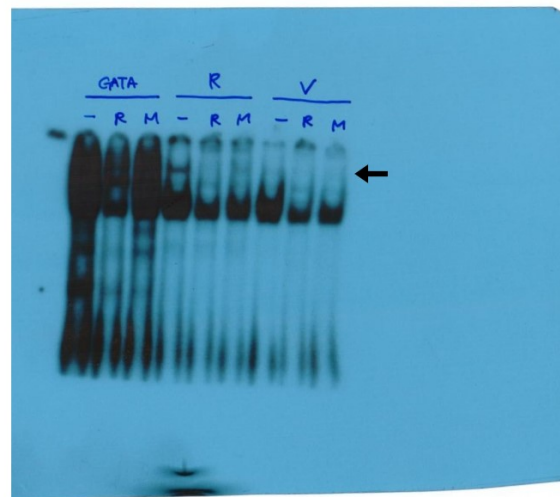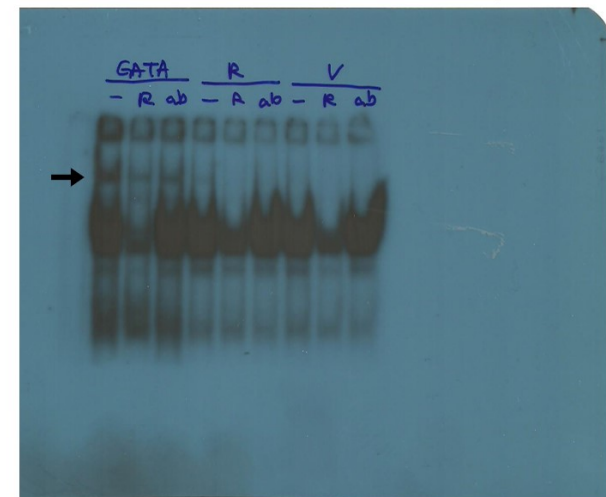

(b)

Repeat 1

Repeat 2

Repeat 3

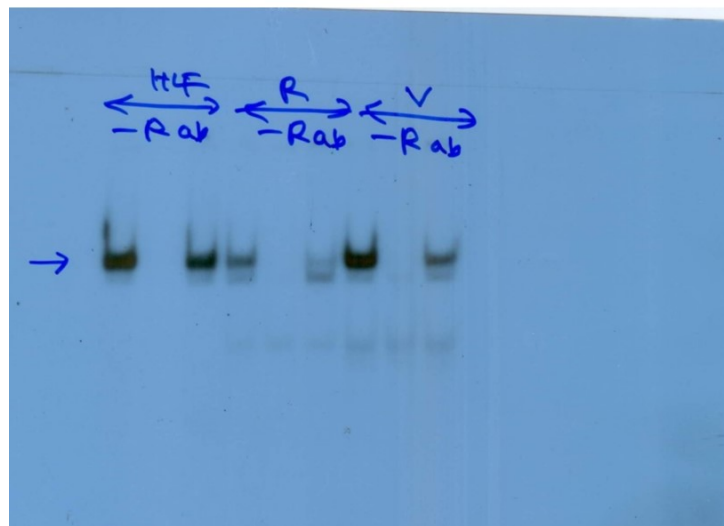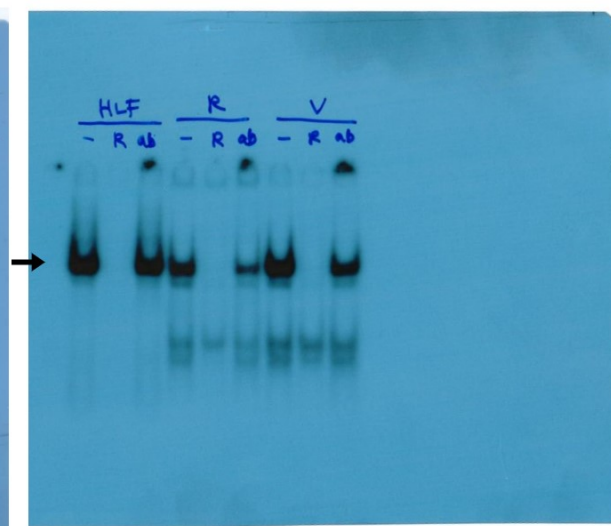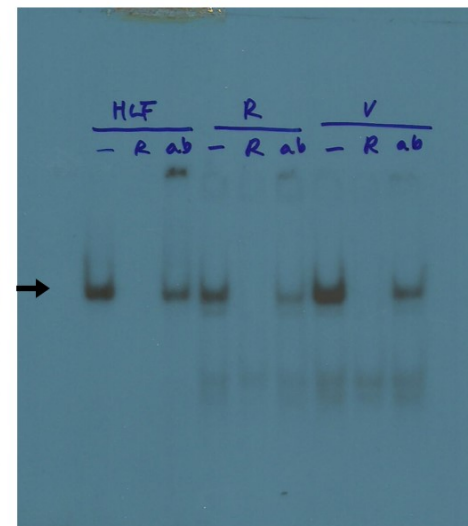

(c)

Repeat 1

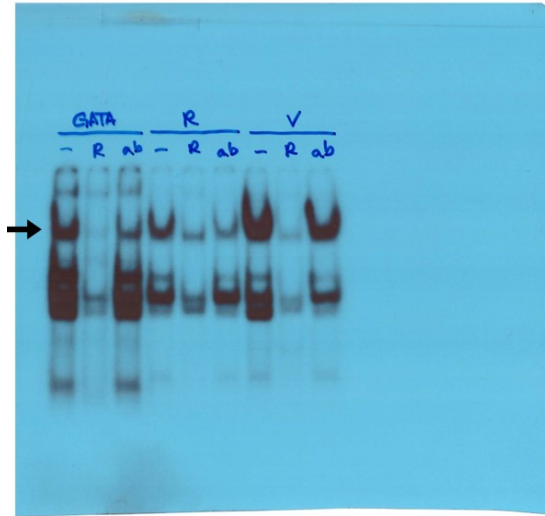

Repeat 2

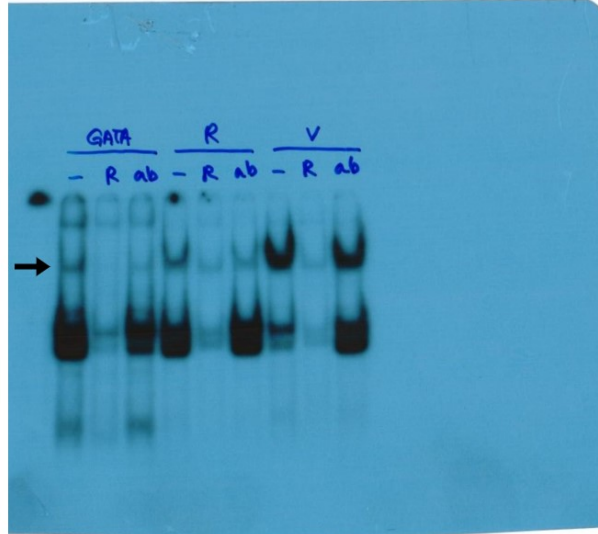

Repeat 3

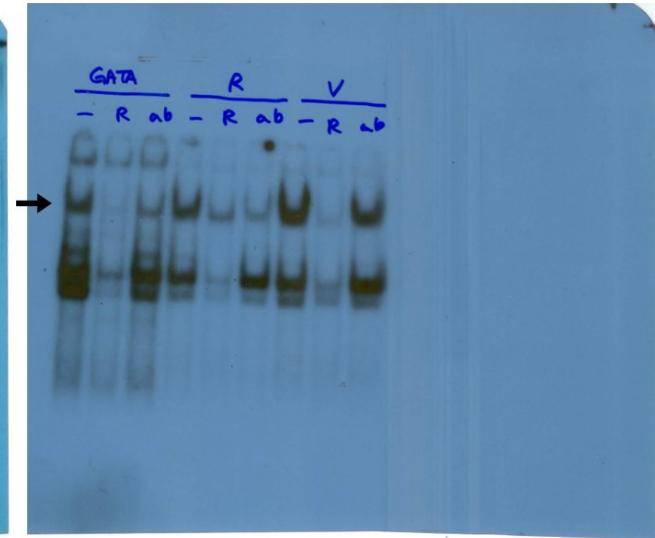

**Supplementary Table 1. Oligonucleotides used in the construction of *ABCA4* plasmids and or in gel shift assays**

|                                                       |                                                                      |
|-------------------------------------------------------|----------------------------------------------------------------------|
| Primes for <i>ABCA4</i> promoter cloning <sup>1</sup> |                                                                      |
| Sense (KpnI site)                                     | 5'-CGG <b>GGT ACC</b> GGA GCC TTT TTG CCA TCA TAA GC-3'              |
| Antisense (NheI site)                                 | 5'-CTA <b>GCT AGC</b> AGG GTC CAG TTC TTC CAG AGC AA-3'              |
| Primers for <i>ABCA4</i> mutagenesis PCR <sup>2</sup> |                                                                      |
| p.Arg290Gln (c.869G>A)                                | 5'-TCA AGA GTT TAT CCA TCA <b>GCC</b> GAG TAT GCA GGA CT-3'          |
| p.Asp645Asn (c.1933G>A)                               | 5'-CC CTG CTT CGT GGA <b>CAA</b> TTC TTT CAT GAT CAT C-3'            |
| p.Thr1117Ala (c.3349A>G)                              | 5'-GAA CCA TCA TCA TGT <b>CCG</b> CTC ACC ACA TGG ACG AG-3'          |
| p.Cys1140Trp (c.3420C>G)                              | 5'-GAA GGC TCT ACT <b>GGT</b> CAG GCA CCC CAC-3'                     |
| p.Asn1588Tyr (c.4762A>T)                              | 5'-TGG CCG GAT CAT <b>GTA</b> TGT GAG CGG GGG-3'                     |
| c.-1086A>C                                            | 5'-GCC TTT TTG CCA TCA TAA GCA GAA ACT <b>CTC</b> TCT CTC TTC TTG-3' |
| c.-900A>T                                             | 5'-GTC TAG AGT CTT TCA AAG AGT <b>ACA</b> CAT TCT GAG ATT TGA GG-3'  |
| c.-761C>A                                             | 5'-CCA CCC CAT TGC AGG GAT GGA ATG ACA GTA ATG-3'                    |
| Oligonucleotides in gel shift assay                   |                                                                      |
| c.-1086A (wild-type) <sup>2</sup>                     | 5'-TAA GCA GAA ACT <b>ATC</b> TCT CTC TTC T-3'                       |
| c.-1086C (variant) <sup>2</sup>                       | 5'-TAA GCA GAA ACT <b>CTC</b> TCT CTC TTC T-3'                       |
| c.-900A (wild-type) <sup>2</sup>                      | 5'-TCT TTC AAA GAG <b>AAC</b> ACA TTC TGA G-3'                       |
| c.-900T (variant) <sup>2</sup>                        | 5'-TCT TTC AAA GAG <b>TAC</b> ACA TTC TGA G-3'                       |
| c.-761C (wild-type) <sup>2</sup>                      | 5'-CCC ATT GCA GGG <b>CTG</b> GAA TGA CAG T-3'                       |
| c.-761A (variant) <sup>2</sup>                        | 5'-CCC ATT GCA GGG <b>ATG</b> GAA TGA CAG T-3'                       |
| GATA-2 consensus <sup>3</sup>                         | 5'-CAC TTG ATA ACA GAA AGT <b>GAT AAC</b> TCT-3'                     |
| HLF consensus <sup>3</sup>                            | 5'-CAG GGT <b>TAC</b> GTA ATC TGC T-3'                               |

<sup>1</sup>Restriction endonuclease sites, <sup>2</sup>SNP sites, and <sup>3</sup>consensus sequences of transcription factors are marked with bold-faced letters.
